# Supplementary material
Source: PubMed Central journal article supplement (PMC7647453)
Supplement: NIHMS1576115-supplement-Supp_info.pdf [file NIHMS1576115-supplement-Supp_info.pdf]

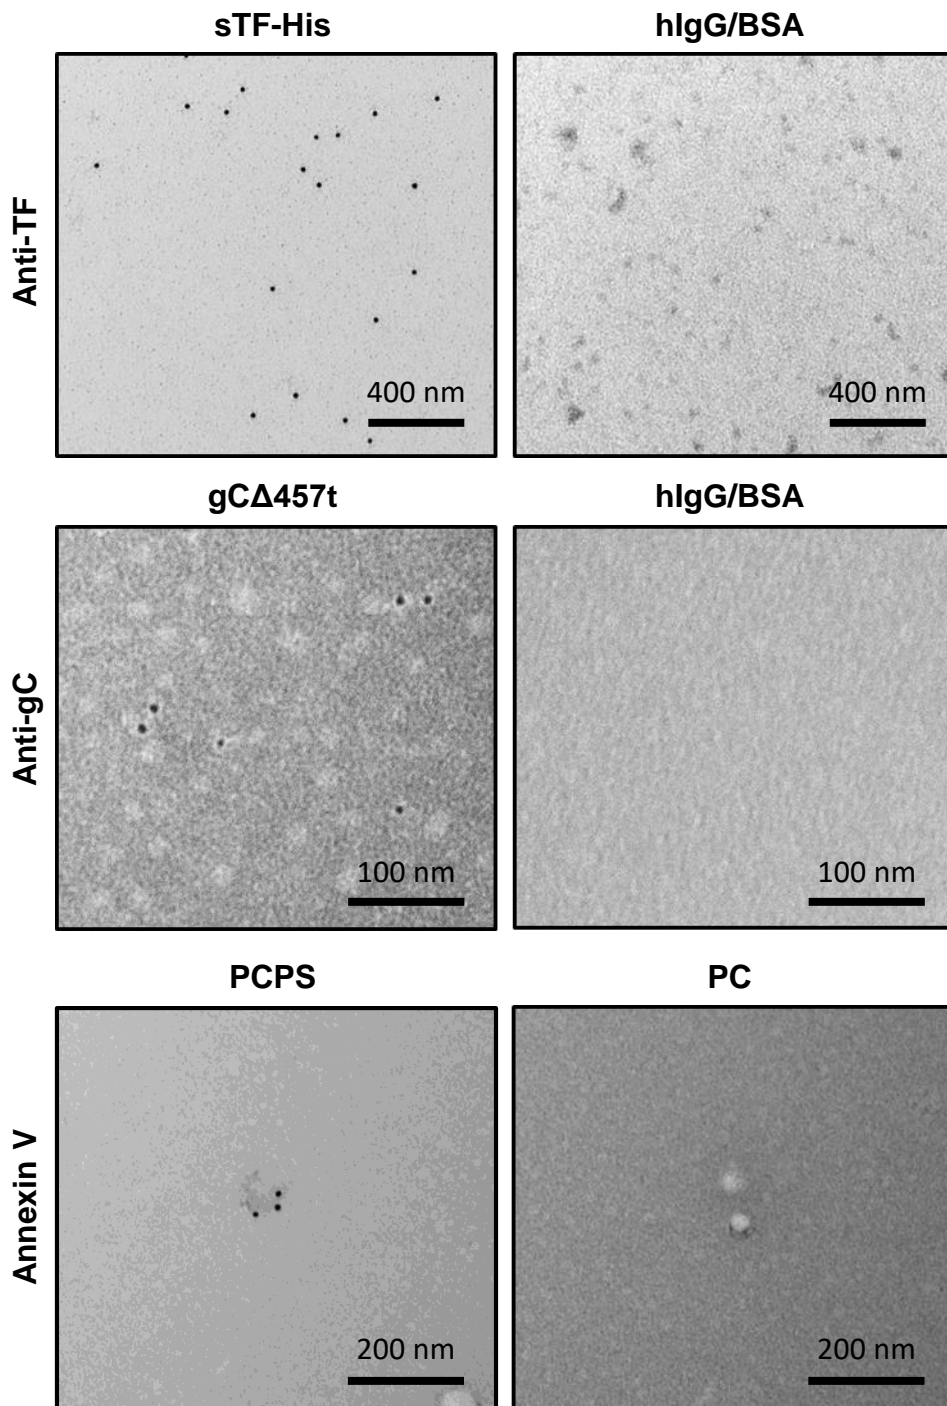

**Fig. S1.** Demonstration of specificity in immunogold EM.

Antigen specificity of antibodies and probes used in immunogold EM were tested by coating grids with purified sTF-His (100 ng) for anti-TF, purified gC $\Delta$ 457t (100 ng) for anti-gC, or aPL-containing PCPS liposomes (200 nmol) for Annexin V. Human IgG (5  $\mu$ g/mL) with 5% BSA and PC only liposomes were used as negative controls.

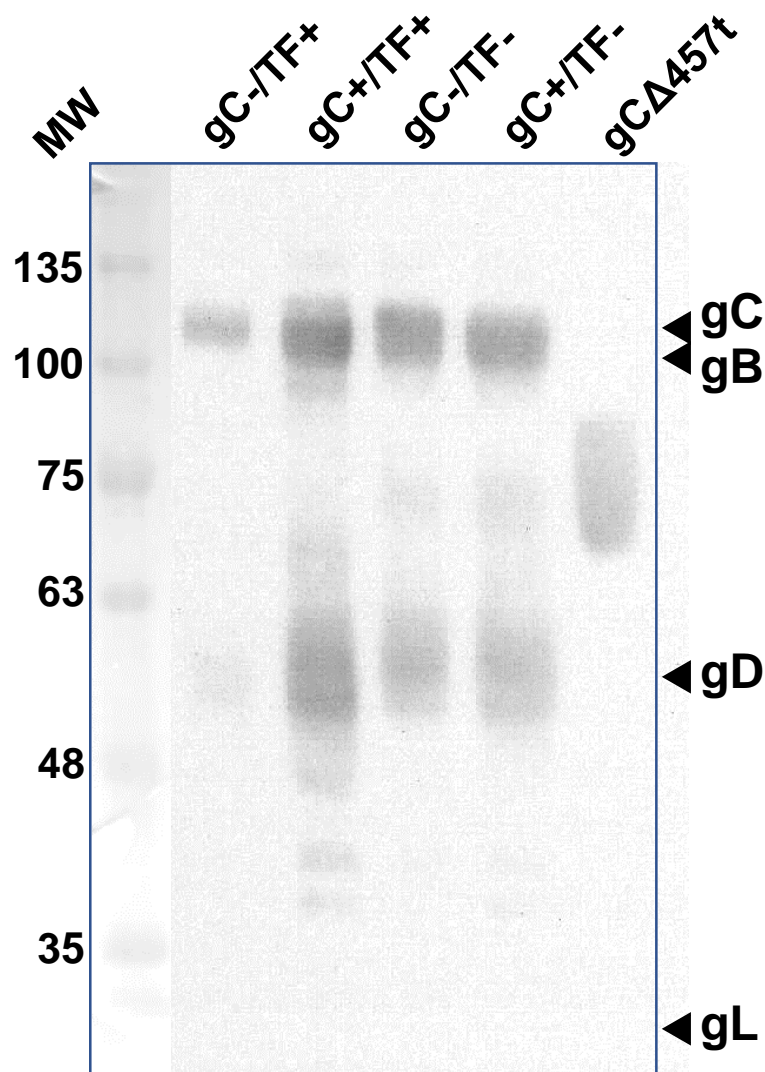

**Fig. S2.** Demonstration of viral antibodies in patient plasma.

Human IgG purified from normal pooled human plasma by Protein G agarose chromatography was used as a primary antibody to detect virus proteins from different forms of HSV1 (HSV1/TF+/gC+, HSV1/TF+/gC-, HSV1/TF-/gC+, and HSV1/TF-/gC-) that were separated by SDS-PAGE ( $1 \times 10^{10}$  virus particles). gC is highly antigenic in plasma and gC $\Delta$ 457t was detected as a purified positive control protein. (100 ng). MW; molecular weight markers

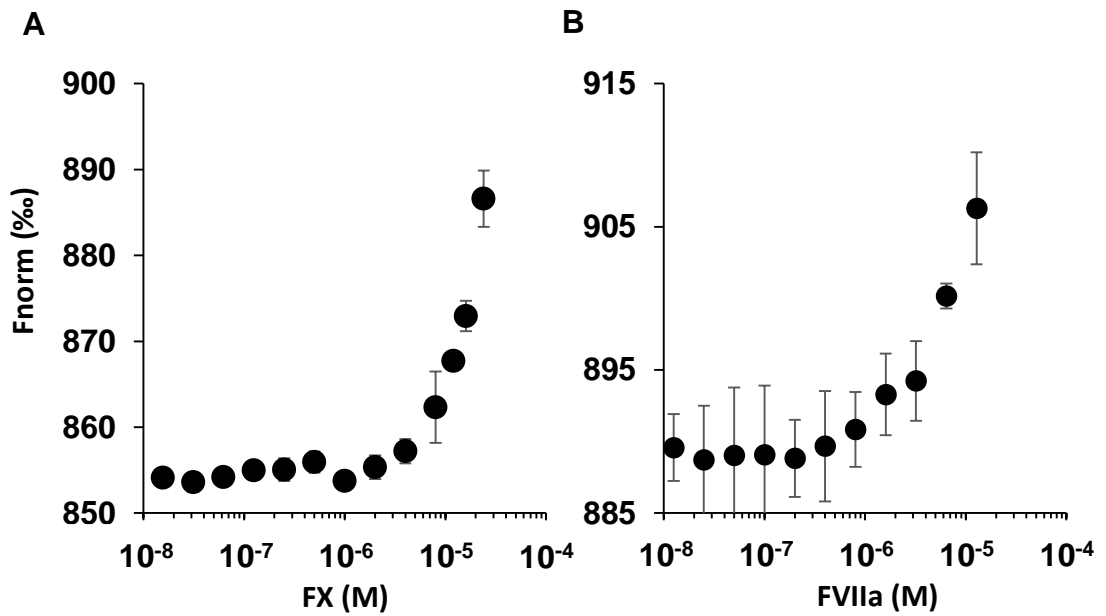

**Fig. S3.** MST traces demonstrating weak associations of FX and FVIIa with gCΔ457t in the absence of membrane associations.

MST was used to follow the interaction between gCΔ457t and (A) FX or (B) FVIIa. gCΔ457t (200 nM) was mixed with the RED-tris-NTA fluorescent probe (3.5 nM) for 30 minutes at room temperature before the addition of FX or FVIIa in HBS/0.05% BSA/0.05% Tween-20/5 mM Ca<sup>2+</sup>. MST power was set at medium with 10% excitation power. Samples were equilibrated at 25 °C prior to instrument reading. n = 3; Error bars: SEM.

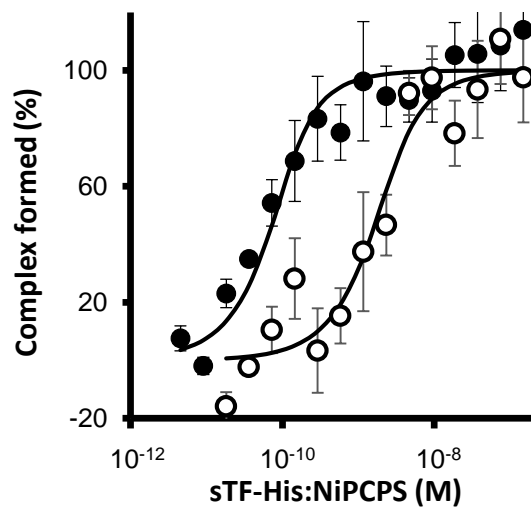

**Fig. S4.** sTF-His binding to FVIIa-R is enhanced by FX.

MST was used to follow the interaction between FVIIa-R (2 nM) and sTF-His on NiPCPS membranes (50  $\mu$ M) with calcium (5 mM) and benzamidine (2 mM) in the absence or presence of 30 nM FX ( $\circ$  and  $\bullet$ , respectively).  $n = 3$ ; Error bars: SEM.

**\*Simplest binding model**

| Ligand  | Lipid  | No FX                                                                 |       | With FX                                                               |       |
|---------|--------|-----------------------------------------------------------------------|-------|-----------------------------------------------------------------------|-------|
|         |        | $K_d$ ( $\mu\text{M}$ ) (95% CI)                                      | $r^2$ | $K_d$ ( $\mu\text{M}$ ) (95% CI)                                      | $r^2$ |
| sgC-His | None   | No fit                                                                | -     | 2.9 (1.5 – 4.2)                                                       | 0.994 |
| sgC-His | PCPS   | No fit                                                                | -     | 2.2 (0.9 – 3.5)                                                       | 0.822 |
| sgC-His | NiPC   | 2.0 (1.3 – 2.8)                                                       | 0.896 | 0.9 (0.7 – 1.0)                                                       | 0.980 |
| sgC-His | NiPCPS | 1.3 (0.1 – 2.7)                                                       | 0.935 | 0.6 (0.2 – 0.9)                                                       | 0.963 |
| sTF-His | NiPCPS | $8.2 \times 10^{-4}$<br>( $8.6 \times 10^{-5} - 1.5 \times 10^{-3}$ ) | 0.930 | $3.7 \times 10^{-5}$<br>( $3.2 \times 10^{-7} - 7.4 \times 10^{-5}$ ) | 0.950 |

**Hill equation**

| Ligand  | Lipid  | No FX                                                                 |       | With FX                                                               |       |
|---------|--------|-----------------------------------------------------------------------|-------|-----------------------------------------------------------------------|-------|
|         |        | $EC_{50}$ ( $\mu\text{M}$ ) (95% CI)                                  | $r^2$ | $EC_{50}$ ( $\mu\text{M}$ ) (95% CI)                                  | $r^2$ |
| sgC-His | None   | >12.0                                                                 | -     | 2.9 (1.6 – 4.2)                                                       | 0.994 |
| sgC-His | PCPS   | >13.0                                                                 | -     | 2.7 (1.3 – 5.3)                                                       | 0.812 |
| sgC-His | NiPC   | 1.6 (0.7 – 3.7)                                                       | 0.925 | 1.0 (0.8 – 1.1)                                                       | 0.992 |
| sgC-His | NiPCPS | 0.8 (0.5 – 1.3)                                                       | 0.943 | 0.4 (0.3 – 0.6)                                                       | 0.974 |
| sTF-His | NiPCPS | $1.0 \times 10^{-3}$<br>( $4.3 \times 10^{-4} - 2.4 \times 10^{-3}$ ) | 0.927 | $3.2 \times 10^{-5}$<br>( $1.8 \times 10^{-5} - 5.6 \times 10^{-5}$ ) | 0.957 |

**Table S1**

\*Data were analyzed using two equations

Simple binding curve: A single interaction between two molecules is characterized by  $K_d = ([A] \cdot [T])/[AT]$ , where A is the protein being monitored (i.e. fluorescent), T is the titrant, and AT is the resulting complex. Where  $A_0$  and  $T_0$  are the initial concentrations added and A and T are the free/unbound concentrations, the law of conservation of mass dictates  $[A_0] = [A] + [AT]$  and  $[T_0] = [T] + [AT]$ . These are used to derive the quadratic equation:

$$[AT] = 1/2 ([A_0] + [T_0] + K_d \pm \sqrt{([A_0] + [T_0] + K_d)^2 - 4 \cdot [A_0] \cdot [T_0]}).$$

To convert  $F_{\text{norm}}$  to [AT], the following equation was used:

$$F_{\text{norm}} = \left( \frac{[A]}{[A_0]} \cdot F_{\text{norm,A}} \right) + \left( \frac{[AT]}{[A_0]} \cdot F_{\text{norm,AT}} \right)$$

$F_{\text{norm,A}}$  is the normalized fluorescence signal when A is not bound to T. Conversely,  $F_{\text{norm,AT}}$  is the corresponding signal when A is bound to T.

Hill equation: A complex interaction where ligand binding shows cooperativity and may deviate from 1:1 binding,

$$F_{\text{norm}}(c) = \text{Unbound} + \frac{\text{Bound} - \text{Unbound}}{1 + 10^{\text{Hill} \cdot \log(\text{EC}_{50} - c)}}.$$

The concentration of titrant (c) was subject to  $\log_{10}$  transformation. “Unbound” is the  $F_{\text{norm}}$  signal of the non-complexed protein whereas “Bound” is the  $F_{\text{norm}}$  signal of the complex.  $\text{EC}_{50}$  is the half-maximal effective concentration and “Hill” is the Hill coefficient of cooperativity.
